# Supplementary material for: An Evaluation of Type 1 Interferon Related Genes in Male and Female-Matched, SARS-CoV-2 Infected Individuals Early in the COVID-19 Pandemic
Source: MDPI journal article supplement (doi:10.3390/v16030472), 2024-03-20
Supplement: s1 [file s1]

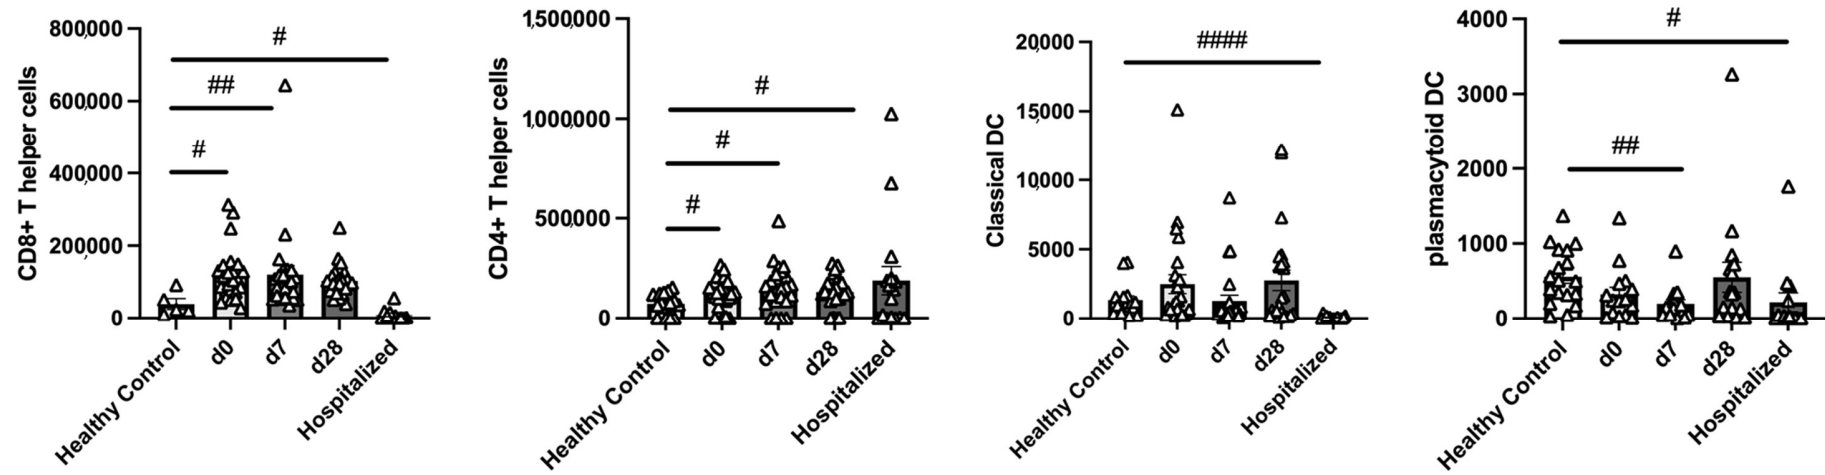

**Supplementary Figure S1.** Flow cytometric analysis of CD3+ CD8+ T cells, CD3+ CD4+ T cells, CD11c hi classical dendritic cells (DC), and CD11c + BDCA-1+ plasmacytoid DC in COVID-19+ individuals compared to healthy controls and hospitalized patients. Whole blood was collected from healthy controls and SARS-CoV2 infected (COVID-19+) people at three timepoints. Day 0 represents a blood draw on the day of SARS-CoV2 detection, day 7 is 1 week later, and day 28 is four weeks after SARS-CoV2 detection. Hospitalized patients were all positive for SARS-CoV2 and blood was collected during their hospital stay. # indicates a significant difference ( $p < 0.05$ ) by student t-test between indicated bars; ##  $p < 0.01$ , ###  $p < 0.001$ , ####  $p < 0.0001$ , #####  $p < 0.00001$ . Healthy controls,  $n = 18$ , and for COVID-19+ individuals,  $n = 22$ .
